# Supplementary material for: Using conventional F-statistics to study unconventional sex-chromosome differentiation
Source: PubMed Central journal article supplement (PMC5410149; doi:10.7717/peerj.3207), 2017-04-27
Supplement: peerj-05-3207-s001.pdf [file peerj-05-3207-s001.pdf]

## Supporting Information

**Table S1a:** Summary of the *Hyla arborea* data used in this study, extracted from Dufresnes et al. (2014b) for sex-linked markers and Dufresnes et al. (2013) for autosomal data (30 loci). ID: locality number used in the mentioned publications; N<sub>m</sub>: number of male samples; N<sub>f</sub>: number of female samples; X-Y dif.: X-Y differentiation estimated by Dufresnes et al. (2014b); N: number of samples.

| ID | Country     | sex-linked loci |                |                     |                   |                   |          | autosomal loci |                 |
|----|-------------|-----------------|----------------|---------------------|-------------------|-------------------|----------|----------------|-----------------|
|    |             | N <sub>m</sub>  | N <sub>f</sub> | ♂-♀ F <sub>st</sub> | ♂ F <sub>is</sub> | ♀ F <sub>is</sub> | X-Y dif. | N              | F <sub>is</sub> |
| 1  | Greece      | 25              | 27             | 0.09                | -0.24             | 0.02              | 0.39     | 52             | 0.01            |
| 2  | Greece      | 6               | -              | -                   | -0.08             | -                 | 0.33     | 6              | 0.02            |
| 3  | Greece      | 25              | -              | -                   | -0.03             | -                 | 0.27     | 25             | 0.09            |
| 5  | Greece      | 20              | -              | -                   | -0.21             | -                 | 0.39     | 22             | -0.02           |
| 8  | Greece      | 18              | 7              | 0.13                | -0.35             | -0.06             | 0.53     | 25             | 0.09            |
| 9  | Greece      | 18              | -              | -                   | -0.36             | -                 | 0.48     | 18             | 0.09            |
| 11 | Greece      | 14              | -              | -                   | -0.39             | -                 | 0.49     | 16             | 0.06            |
| 24 | Serbia      | 6               | -              | -                   | -0.37             | -                 | 0.56     | 7              | 0.10            |
| 28 | Albania     | 8               | 10             | 0.11                | -0.18             | -0.14             | 0.49     | 20             | -0.01           |
| 30 | Croatia     | 18              | -              | -                   | -0.59             | -                 | 0.62     | 18             | 0.06            |
| 31 | Croatia     | 7               | 5              | 0.20                | -0.57             | 0.12              | 0.62     | 12             | -0.09           |
| 32 | Croatia     | 20              | -              | -                   | -0.58             | -                 | 0.51     | 22             | 0.03            |
| 33 | Croatia     | 14              | 12             | 0.23                | -0.53             | 0.03              | 0.64     | 26             | 0.07            |
| 37 | Croatia     | 18              | 18             | 0.22                | -0.40             | -0.01             | 0.55     | 36             | 0.02            |
| 38 | Croatia     | 25              | 25             | 0.25                | -0.51             | 0.05              | 0.69     | 50             | 0.07            |
| 39 | Croatia     | 19              | -              | -                   | -0.48             | -                 | 0.69     | 19             | 0.06            |
| 40 | Serbia      | 15              | 14             | 0.19                | -0.42             | -0.07             | 0.69     | 30             | 0.00            |
| 41 | Romania     | 11              | -              | -                   | -0.46             | -                 | 0.67     | 11             | 0.01            |
| 42 | Romania     | 5               | 6              | 0.19                | -0.39             | -0.05             | 0.73     | 13             | 0.02            |
| 43 | Romania     | 10              | 8              | 0.19                | -0.45             | 0.00              | 0.77     | 20             | 0.07            |
| 44 | Hungary     | 15              | -              | -                   | -0.39             | -                 | 0.71     | 16             | 0.00            |
| 45 | Austria     | 18              | 8              | 0.20                | -0.47             | -0.20             | 0.69     | 26             | 0.03            |
| 48 | Poland      | 9               | -              | -                   | -0.69             | -                 | 0.87     | 9              | 0.08            |
| 49 | Switzerland | 18              | 15             | 0.27                | -0.62             | 0.06              | 0.83     | 33             | 0.05            |
| 55 | Netherlands | 19              | -              | -                   | -0.72             | -                 | 0.89     | 23             | -0.05           |
| 56 | Switzerland | 15              | 15             | 0.38                | -0.75             | 0.16              | 0.88     | 30             | 0.07            |
| 57 | France      | 22              | 7              | 0.27                | -0.64             | -0.23             | 0.78     | 29             | -0.02           |
| 66 | Sweden      | 8               | -              | -                   | -0.77             | -                 | 0.82     | -              | -               |

**Table S1b:** Summary of the *Rana temporaria* data used in this study, extracted from Rodrigues et al. (2013, 2014). N<sub>m</sub>: number of male samples; N<sub>f</sub>: number of female samples.

| Locality        | Country     | sex-linked loci |                |                     |                   |                   |
|-----------------|-------------|-----------------|----------------|---------------------|-------------------|-------------------|
|                 |             | N <sub>m</sub>  | N <sub>f</sub> | ♂-♀ F <sub>st</sub> | ♂ F <sub>is</sub> | ♀ F <sub>is</sub> |
| Estrange        | Sweden      | 24              | 28             | 0.02                | 0.02              | -0.03             |
| Ammarnäs        | Sweden      | 24              | 21             | 0.15                | -0.42             | 0.03              |
| Hampjärn-Grytan | Sweden      | 27              | 20             | 0.13                | -0.24             | 0.03              |
| Häggedal        | Sweden      | 28              | 23             | 0.07                | -0.11             | 0.09              |
| Lindragen       | Sweden      | 16              | 9              | 0.06                | 0.18              | 0.40              |
| Tvedöra         | Sweden      | 22              | 23             | 0.01                | 0.11              | 0.06              |
| Lavigny         | Switzerland | 18              | 18             | 0.00                | 0.09              | 0.05              |
| Cossonay        | Switzerland | 6               | 6              | 0.00                | 0.14              | 0.10              |
| Bex             | Switzerland | 31              | 31             | 0.01                | 0.06              | 0.02              |
| Retaud          | Switzerland | 5               | 5              | 0.01                | 0.19              | 0.06              |
