# Supplementary material for: Using conventional F-statistics to study unconventional sex-chromosome differentiation
Source: PubMed Central journal article supplement (PMC5410149; doi:10.7717/peerj.3207), 2017-04-27

**Figure S1:  $F_{st}$  between sexes ( $\text{♂-♀ } F_{st}$ ) versus male  $F_{is}$  ( $\text{♂ } F_{is}$ ) without correction (A), corrected by female  $F_{is}$  ( $\text{♀ } F_{is}$ ) (B) or autosomal  $F_{is}$  (C) for each sex-linked loci in *Hyla arborea*.  $R^2$  of the linear regressions are indicated, and a regression line is shown when the regression was significant. Photo credit: Christophe Dufresnes**

A)  $\text{♂ } F_{is}$  vs  $\text{♂}-\text{♀ } F_{st}$

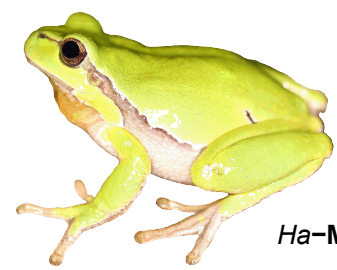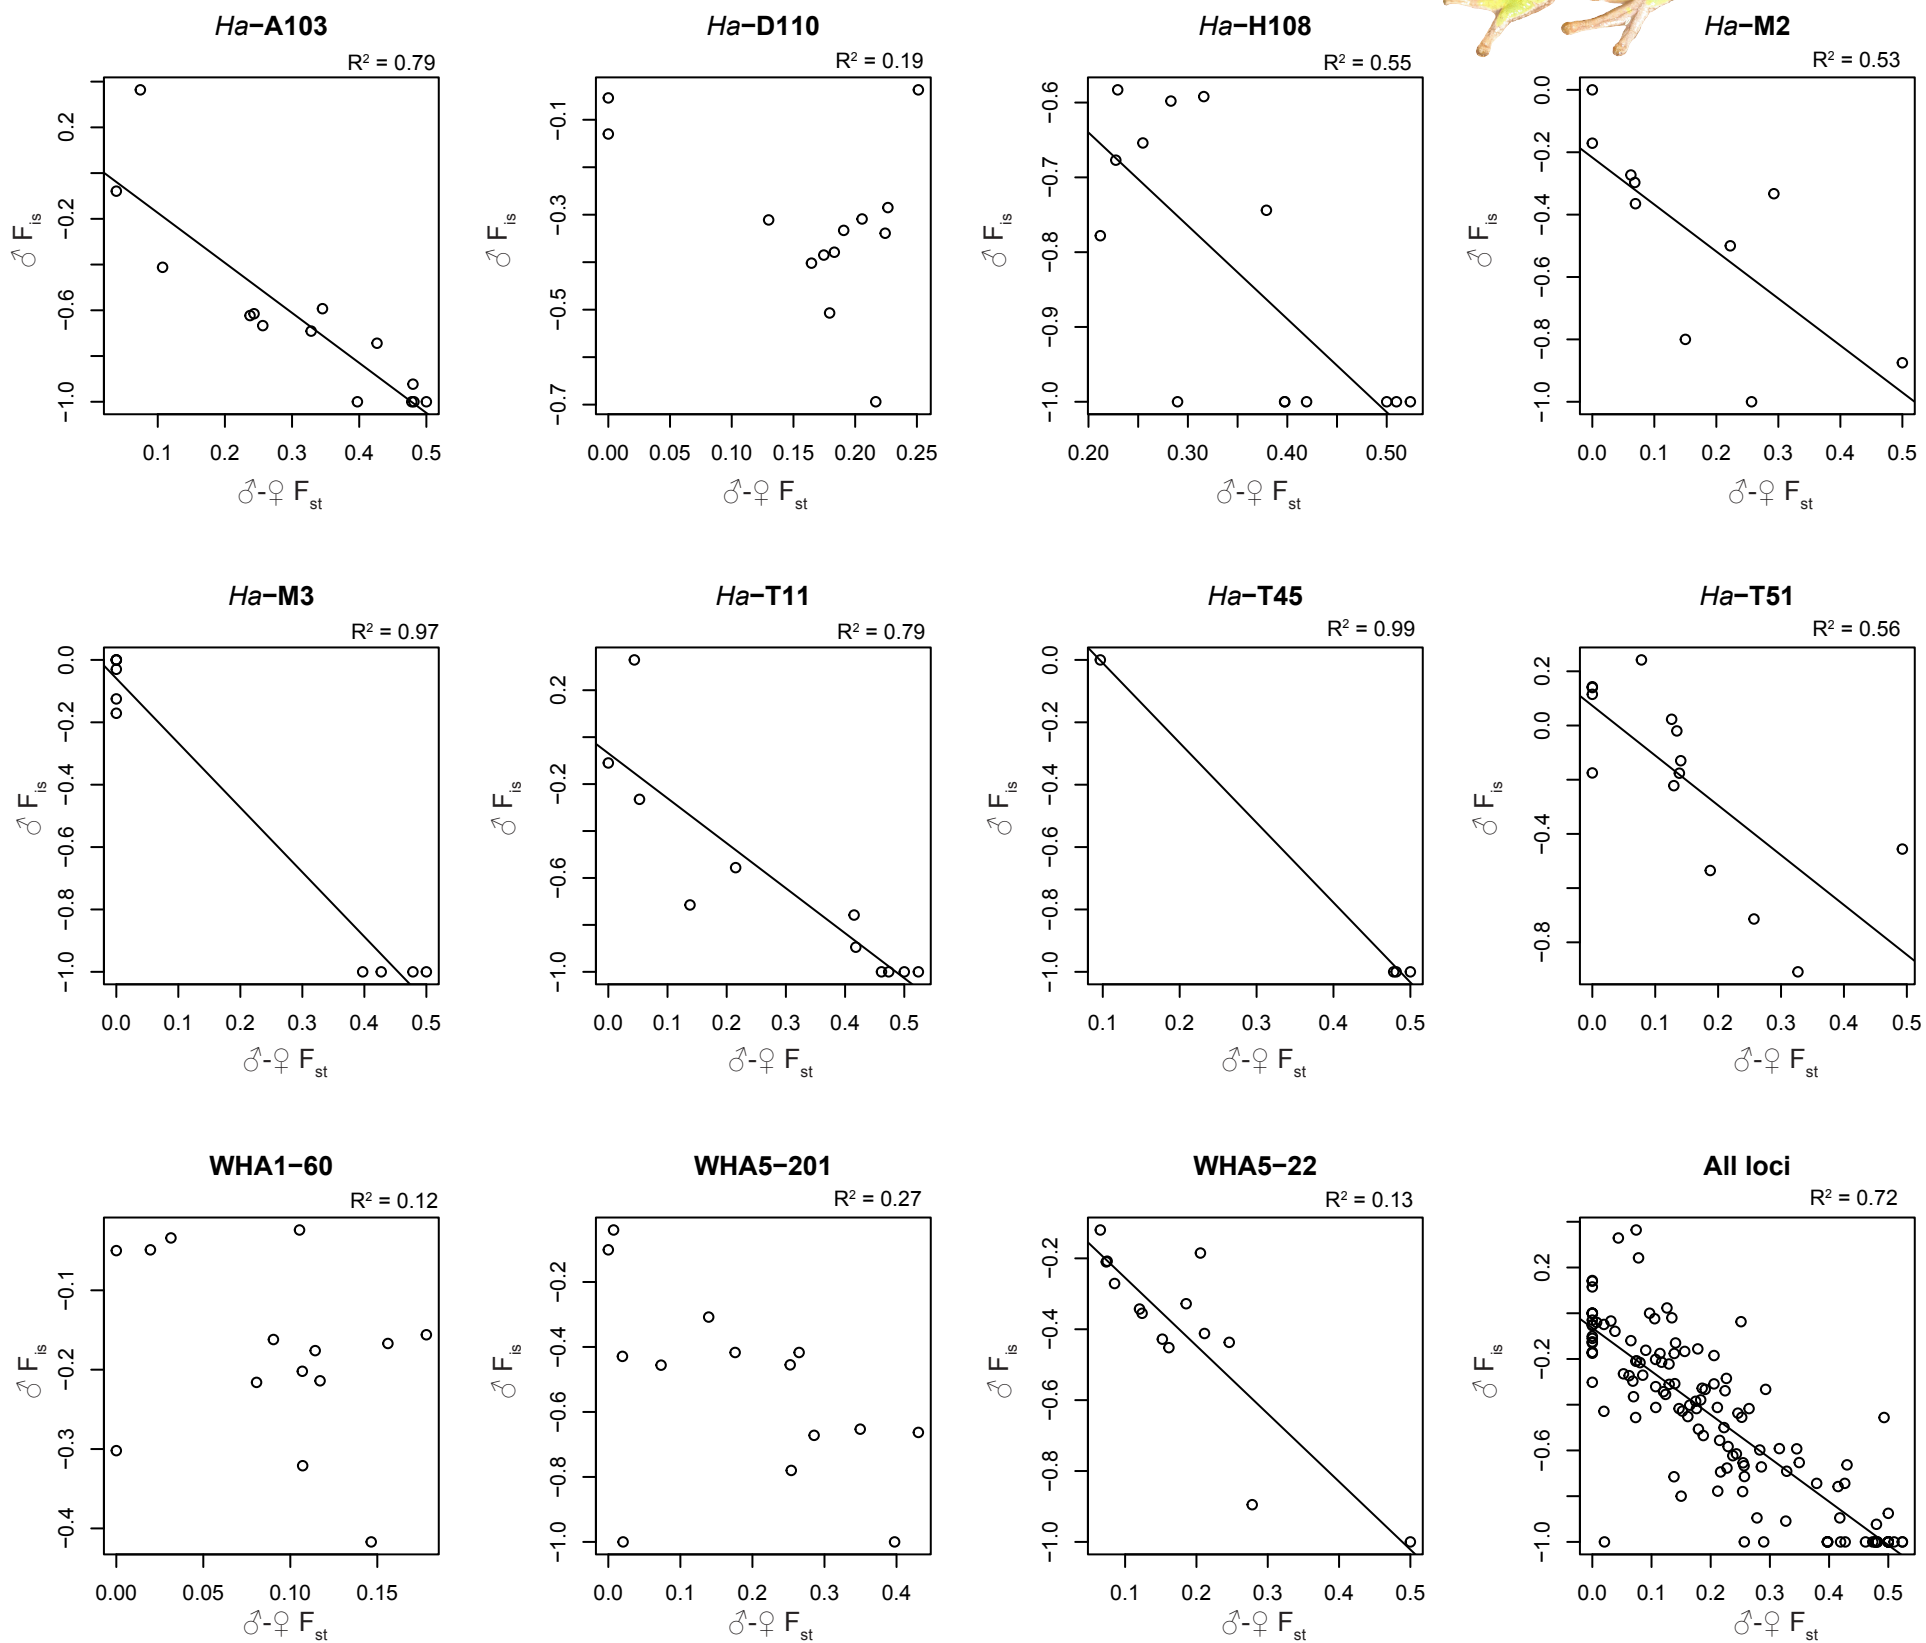

B)  $\text{♂ } F_{is}$  (corrected by  $\text{♀ } F_{is}$ ) vs  $\text{♂}-\text{♀ } F_{st}$

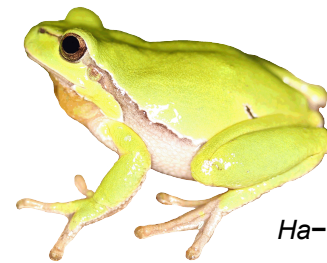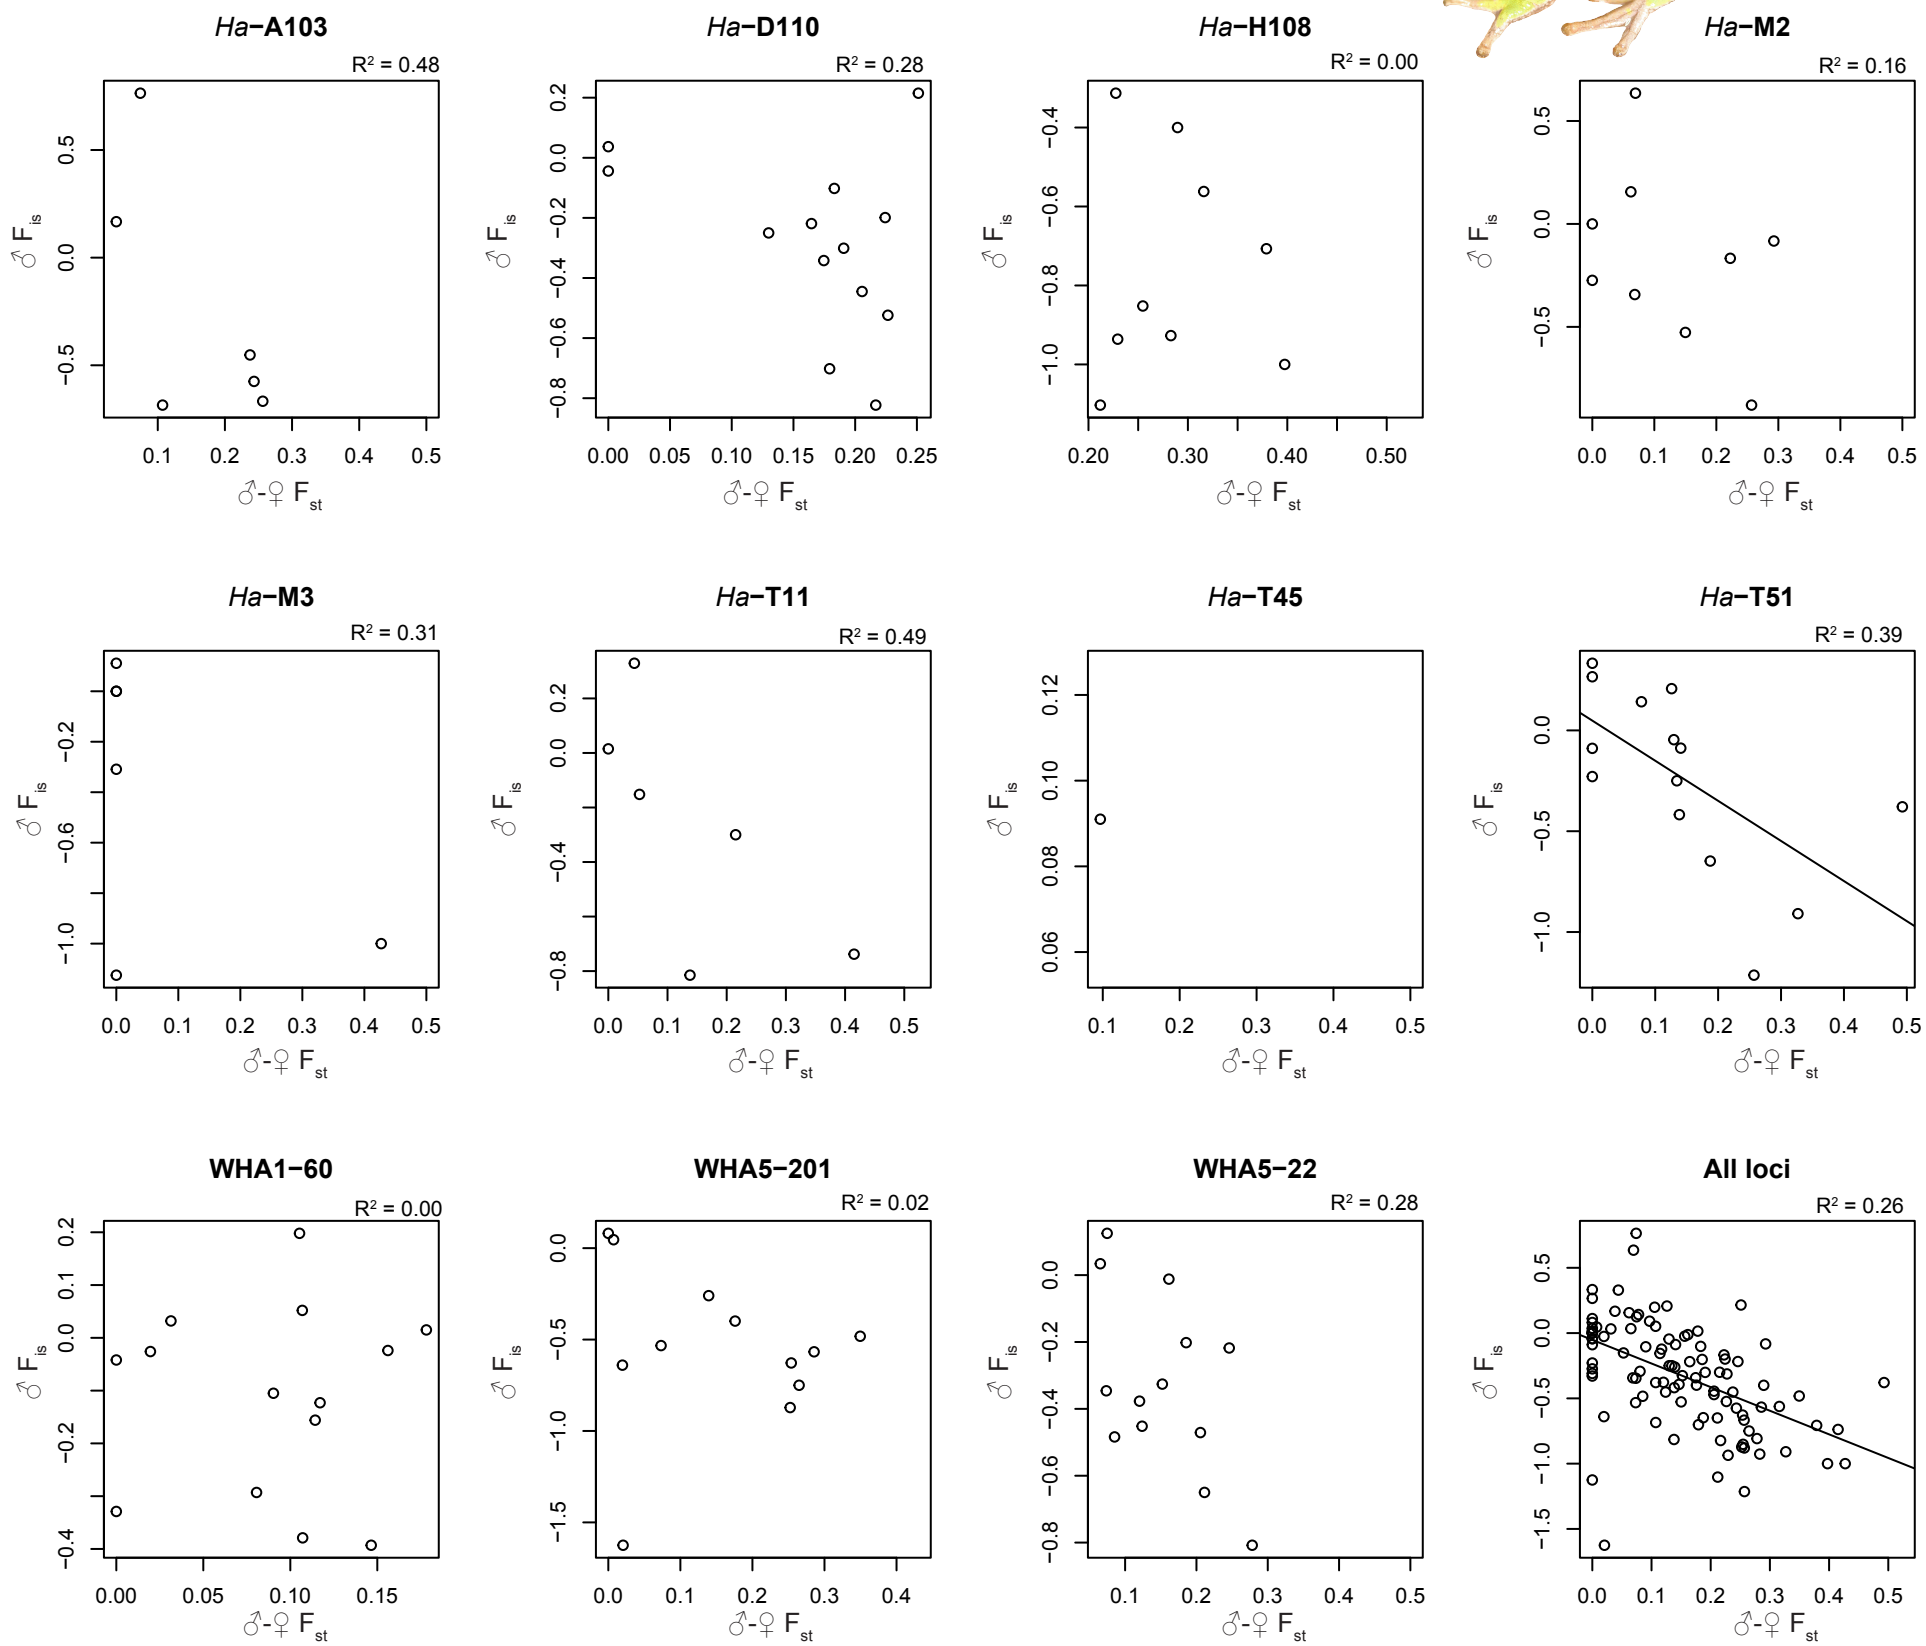

C)  $\text{♂ } F_{is}$  (corrected by autosomal  $F_{is}$ ) vs  $\text{♂-♀ } F_{st}$

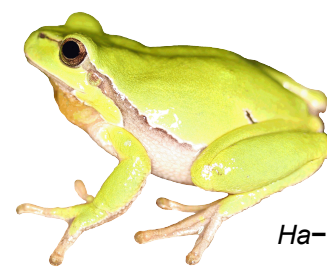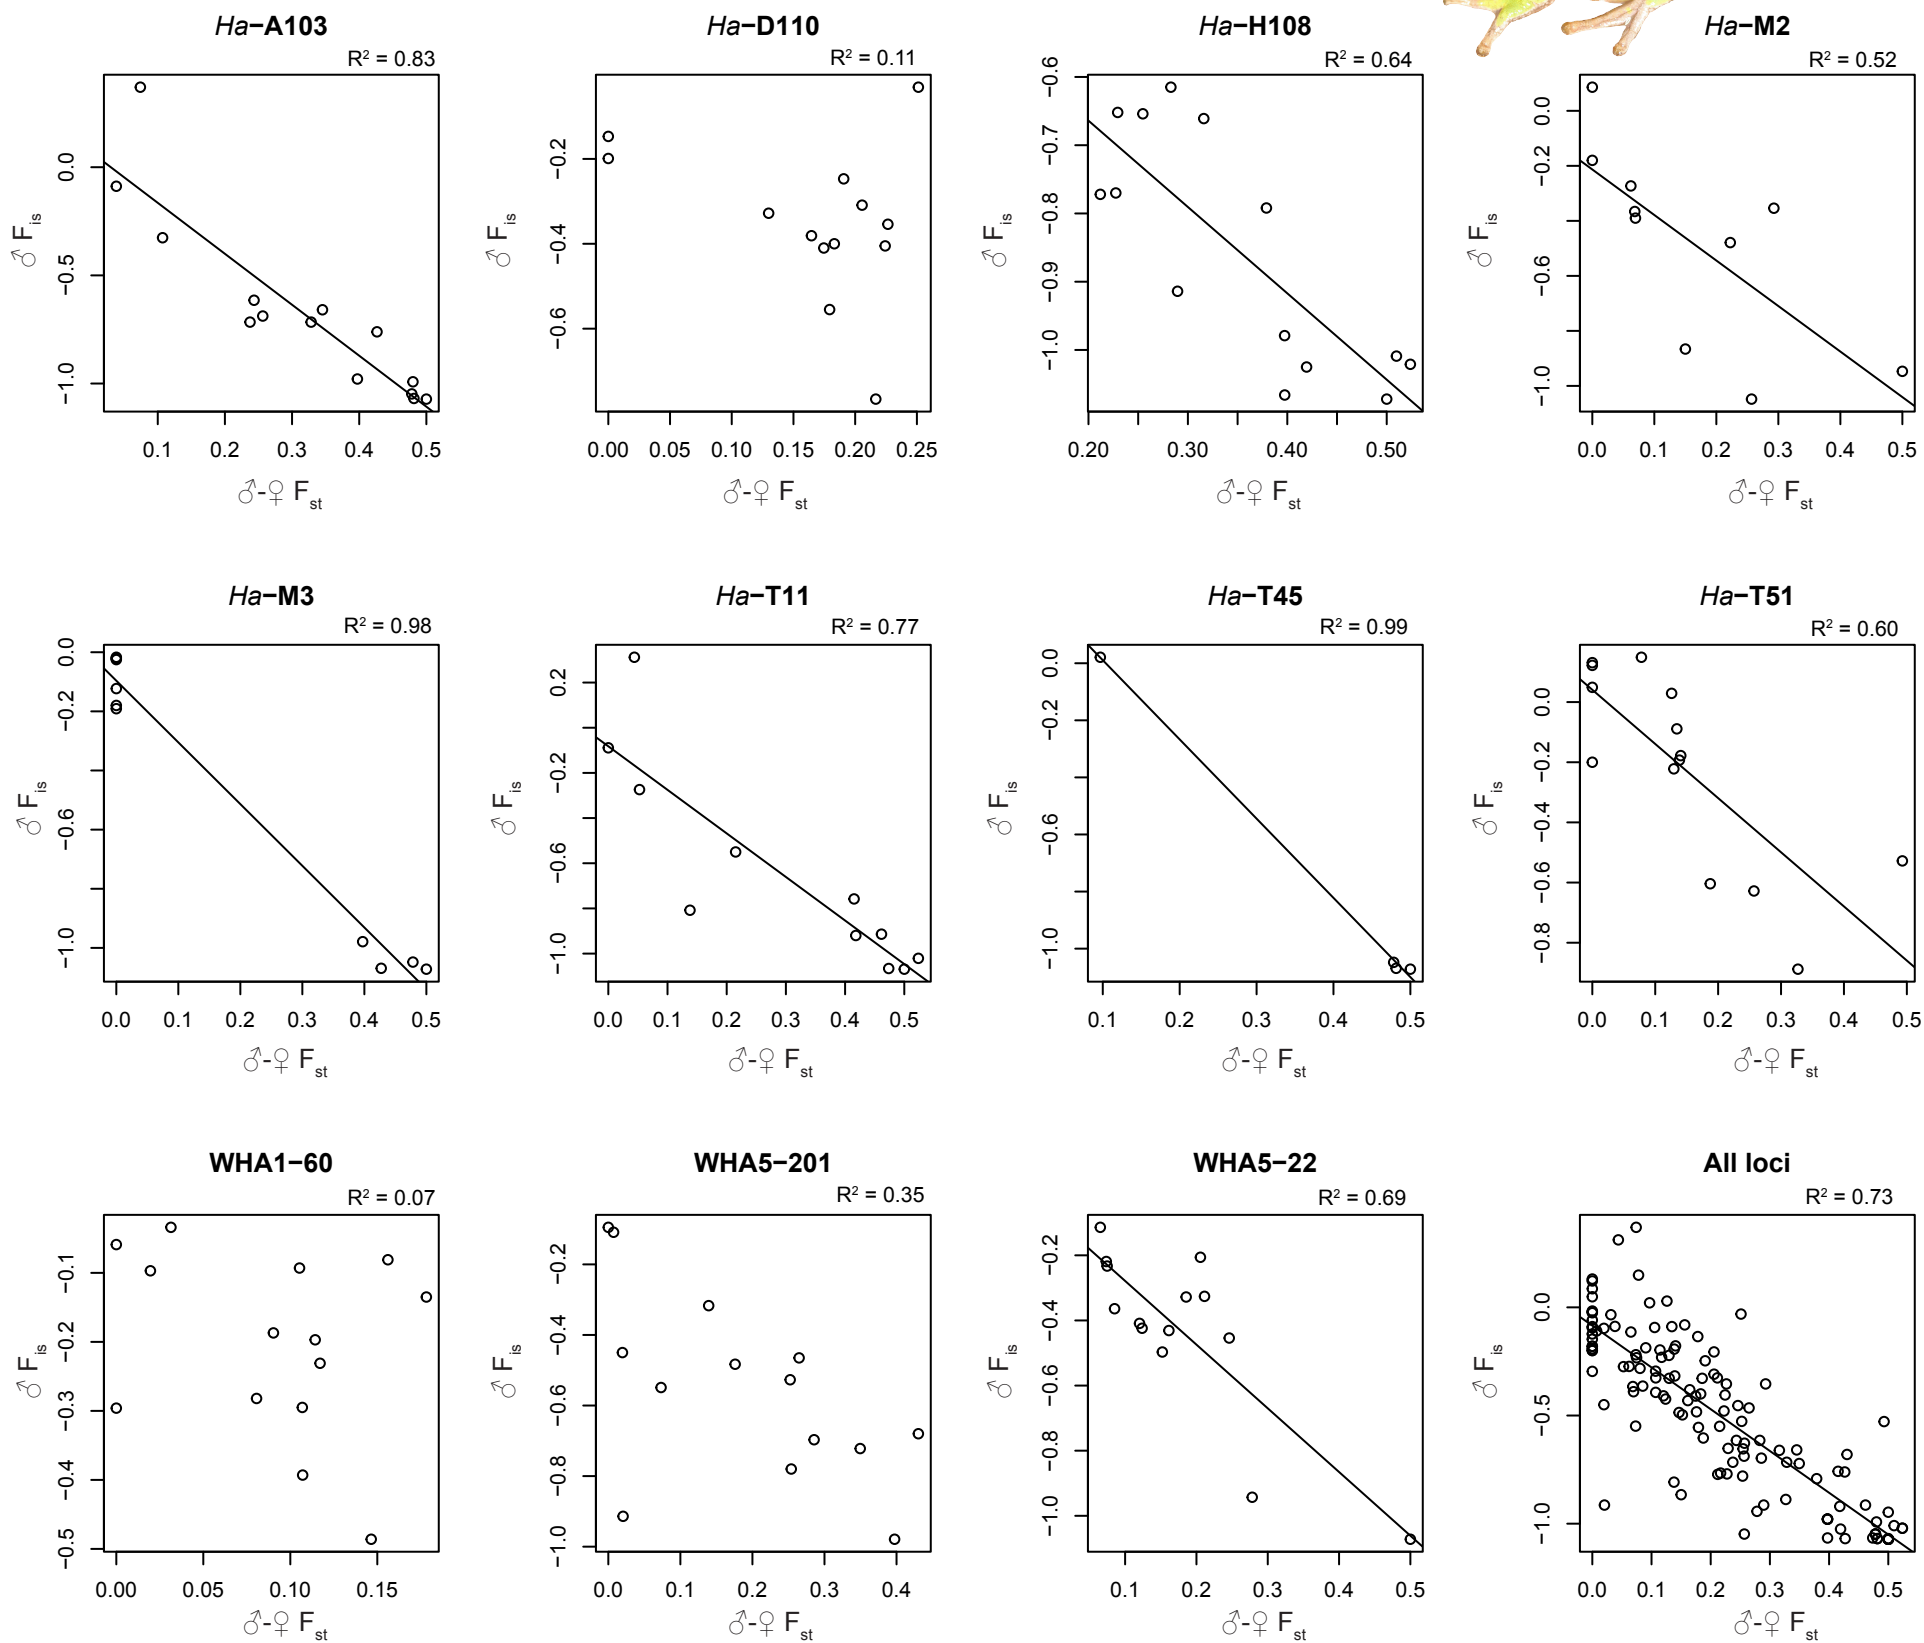

Supplement: peerj-05-3207-s002.pdf [file peerj-05-3207-s002.pdf]
